# Supplementary material
Source: PubMed Central journal article supplement (PMC8678297)
Supplement: NIHMS1746953-supplement-Supplemental_Digital_Content_1.pdf [file NIHMS1746953-supplement-Supplemental_Digital_Content_1.pdf]

## Appendix 1.

In addition to the authors, other members of the *Eunice Kennedy Shriver* National Institute of Child Health and Human Development Maternal-Fetal Medicine Units Network are as follows:

*University of Utah Health Sciences Center, Salt Lake City, UT* – K. Hill, R. Silver, M. Varner, A. Sowles, K. Coleman (Utah Valley Hospital), D. Atkinson (Utah Valley Hospital), J. Stratford (McKay-Dee Hospital), S. Dellermann (McKay-Dee Hospital), C. Meadows (McKay-Dee Hospital), S. Esplin (Intermountain Med Ctr), C. Martin (Intermountain Med Ctr), K. Peterson (Intermountain Med Ctr), S. Stradling (LDS Hospital)

*Northwestern University, Chicago, IL* – G. Mallett, A. Peaceman, B. Plunkett (NorthShore University), K. Paycheck (NorthShore University), M. Dinsmoor (NorthShore University)

*University of Alabama at Birmingham, Birmingham, AL* – S. Harris, J. Sheppard, J. Biggio, L. Harper, S. Longo (Ochsner), C. Servay (Ochsner)

*Stanford University, Stanford, CA* – C. Willson, D. Lyell, A. Girsen, R. Knapp

*Columbia University, New York, NY* – C. Gyamfi, S. Bousleiman, A. Perez-Delboy, M. Talucci, V. Carmona, L. Plante (Drexel University), C. Tocci (Drexel University), B. Leopanto (Drexel University), M. Hoffman (Christiana Care), L. Dill-Grant (Christiana Care), K. Palomares (St. Peter's Univ. Hosp.), S. Otarola (St. Peter's Univ. Hosp.), D. Skupski (NYP Queen), R. Chan (NYP Queens)

*Brown University, Providence, RI* – D. Allard, T. Gelsomino, J. Rousseau, L. Beati, J. Milano, E. Werner

*University of Texas Medical Branch, Galveston, TX* – A. Salazar, M. Costantine, G. Chiossi, L. Pacheco, A. Saad, M. Munn, S. Jain, S. Clark

*University of North Carolina at Chapel Hill, Chapel Hill, NC* – K. Clark, K. Boggess, S. Timlin, K. Eichelberger (Greenville Memorial Hospital), A. Moore (Greenville Memorial Hospital), C. Beamon (WakeMed Health & Hospitals), H. Byers (WakeMed Health & Hospitals)

*UT Health- University of Texas Medical School at Houston--Children's Memorial Hermann Hospital, Houston, TX* – F. Ortiz, L. Garcia (Harris Health System, Lyndon B. Johnson Hospital), B. Sibai

*The Ohio State University, Columbus, OH* – A. Bartholomew, J. Iams, C. Buhimschi, M. Landon, F. Johnson, L. Webb, D. McKenna (Miami Valley Hospital), K. Fennig (Miami Valley Hospital), K. Snow (Miami Valley Hospital), M. Habli (Good Samaritan Hospital), M. McClellan (Good Samaritan Hospital), C. Lindeman (Good Samaritan Hospital)

*MetroHealth Medical Center-Case Western Reserve University, Cleveland, OH* – W. Dalton, D. Hackney (University Hospital Cleveland), H. Cozart, A. Mayle, B. Mercer

*University of Texas Southwestern Medical Center, Dallas, TX* – L. Moseley, J. Gerald, L. Fay-Randall, M. Garcia, A. Sias, J. Price

*University of Colorado, Denver, CO* – K. Hale, R. Gibbs, J. Phipers, K. Heyborne

*University of Pennsylvania, Philadelphia, PA* – J. Craig, S. Parry, H. Sehdev (Pennsylvania Hospital)

*Duke University, Durham, NC* – T. Bishop, J. Ferrara

*University of Pittsburgh, Pittsburgh, PA* – M. Bickus, S. Caritis

*The George Washington University Biostatistics Center, Washington, DC* – E. Thom, M. Rice, L. Doherty, J. de Voest

*Eunice Kennedy Shriver National Institute of Child Health and Human Development, Bethesda, MD* – S. Tolivaisa, M. Miodovnik  
MFMU Network Steering Committee Chair (*Washington University, Saint Louis, MO*) – G. A. Macones, MD, MSCE

Debbink MP, Ugwu LG, Grobman WA, Reddy UM, Tita ATN, El-Sayed Y, et al. Racial and ethnic inequities in cesarean birth and maternal morbidity in a low-risk, nulliparous cohort. *Obstet Gynecol* 2022;139.

The authors provided this information as a supplement to their article.

©2021 American College of Obstetricians and Gynecologists.
